# Supplementary material for: Arylsulfanyl radical lifetime in nanostructured silica: dramatic effect of the organic monolayer structure
Source: Royal Society of Chemistry journal article supplement (doi:10.1039/c4sc01907e), 2014-01-01
Supplement: c4sc01907e2.pdf [file c4sc01907e2.pdf]

**Name : vSBAA-2-CS.avi**

Descriptive title : Structuration of an organic monolayer on the surface of a pore of a highly loaded SBA-15 silica.

Video legend : Molecular dynamics enables to visualize the structuration of the pore. This movie illustrates the behavior of the organic moieties anchored on the surface for the highly loaded silica **vSBAA-2**.

Keywords : functionalized SBA-15, SBA pore, organic monolayer, pore transverse section, pore longitudinal section.

**Name : vSBAb-2-CS.avi**

Descriptive title : Structuration of an organic monolayer in a pore of a moderately loaded SBA-15 silica.

Video legend : Molecular dynamics enables to visualize the structuration of the pore. This movie illustrates the behavior of the organic moieties anchored on the surface for the moderately loaded silica **vSBAb-2**.

Keywords : functionalized SBA-15, SBA pore, organic monolayer, pore transverse section, pore longitudinal section.
